# Supplementary material for: γ-Secretase inhibitor enhances antitumour effect of radiation in Notch-expressing lung cancer
Source: PubMed Central journal article supplement — Br J Cancer. 2012 May 17;106(12):1953–9. doi: 10.1038/bjc.2012.178 (PMC3388558; doi:10.1038/bjc.2012.178), 2012-05-17
Supplement: bjc2012178x2.pdf [file bjc2012178x2.pdf]

**Supplementary Table 1. IC<sub>50</sub> of GSI I after radiation in HCC2429, H460 and H1395**

|                       | <b>HCC2429</b> | <b>H460</b>  | <b>H1395</b> |
|-----------------------|----------------|--------------|--------------|
| <b>Radiation (Gy)</b> |                |              |              |
| 0 (GSI alone)         | 0.78 ± 0.13    | 2.00 ± 0.25  | 3.21 ± 0.32  |
| 2                     | 0.70 ± 0.10    | 1.33 ± 0.15* | 3.07 ± 0.29  |
| 4                     | 0.61 ± 0.09*   | 1.50 ± 0.32* | 3.01 ± 0.25  |

\*p<0.05: Statistical dose reduction was observed compared to GSI alone (0Gy)
