# Supplementary figures and images for: γ-Secretase inhibitor enhances antitumour effect of radiation in Notch-expressing lung cancer
Source: PubMed Central journal article supplement — Br J Cancer. 2012 May 17;106(12):1953–9. doi: 10.1038/bjc.2012.178 (PMC3388558; doi:10.1038/bjc.2012.178), 2012-05-17

## HCC2429

### Notch1

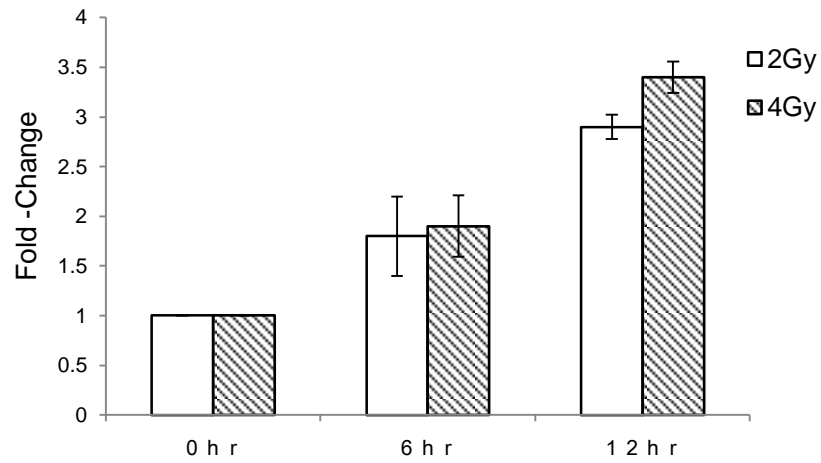

## H460

### Notch3

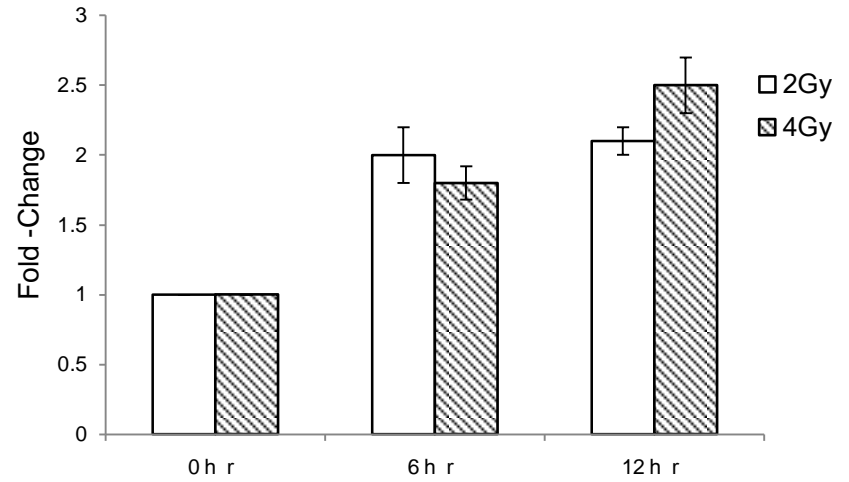

### HCC2429

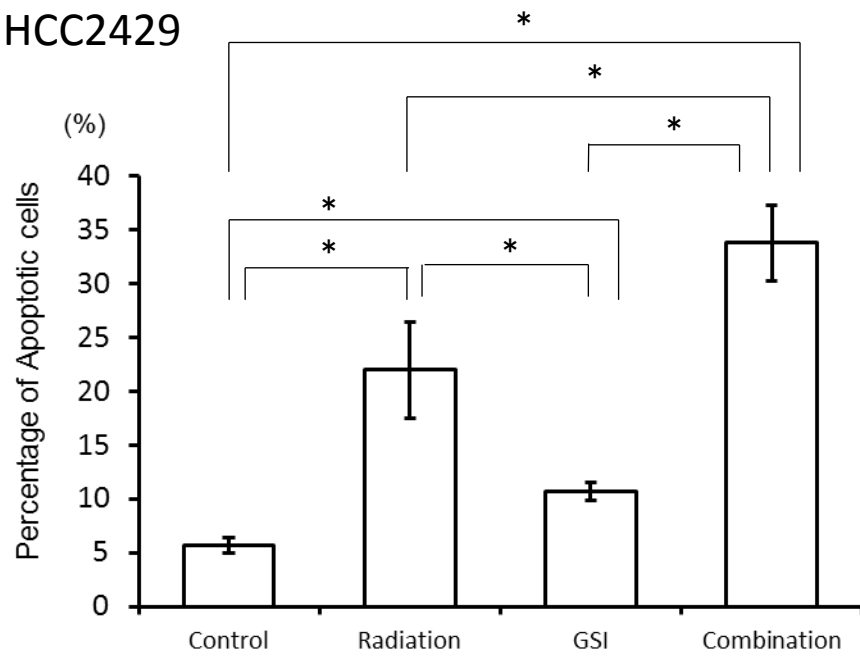

### H460

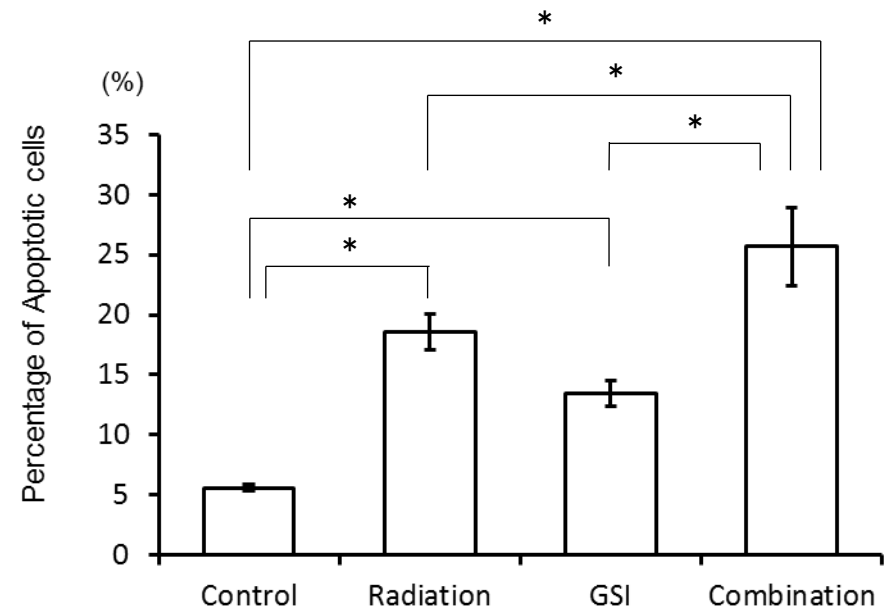

### A549

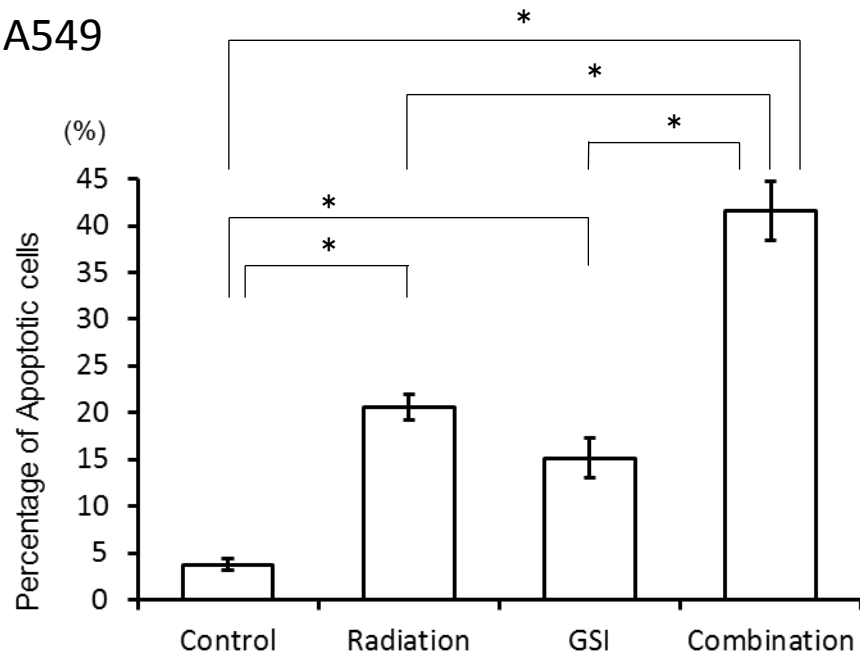

Mean  $\pm$  SE (n=4)

\* : p < 0.05

Supplement: bjc2012178x1.pdf [file bjc2012178x1.pdf]
